# Supplementary material for: Fluorescence nanoprobes bearing low temperature-derived biochar nanoparticles as efficient quenchers for the detection of single-stranded DNA and 17β-estradiol and their analytical potential
Source: Royal Society of Chemistry journal article supplement (doi:10.1039/d4ra03168g), 2024-01-01
Supplement: d4ra03168g1.pdf [file d4ra03168g1.pdf]

# **Fluorescence nanoprobe bearing low temperature derived biochar nanoparticles as efficient quenchers for detection of single-stranded DNA and 17 $\beta$ -estradiol and analytical potential**

Xiaoli Qi<sup>†</sup>, Hui Hu<sup>†</sup>, Lina Liang, Yuqing Lin, Yudan Liu, Haifeng Sun, and Yunxian Piao\*

Key Laboratory of Groundwater Resources and Environment (Jilin University), Ministry of Education, Jilin Provincial Key Laboratory of Water Resources and Environment, College of New Energy and Environment, Jilin University, Changchun 130021, China

\*Corresponding author: Professor Yunxian Piao      E-mail: yxpiao@jlu.edu.cn

<sup>†</sup>: Xiaoli Qi and Hui Hu contributed equally to this work.

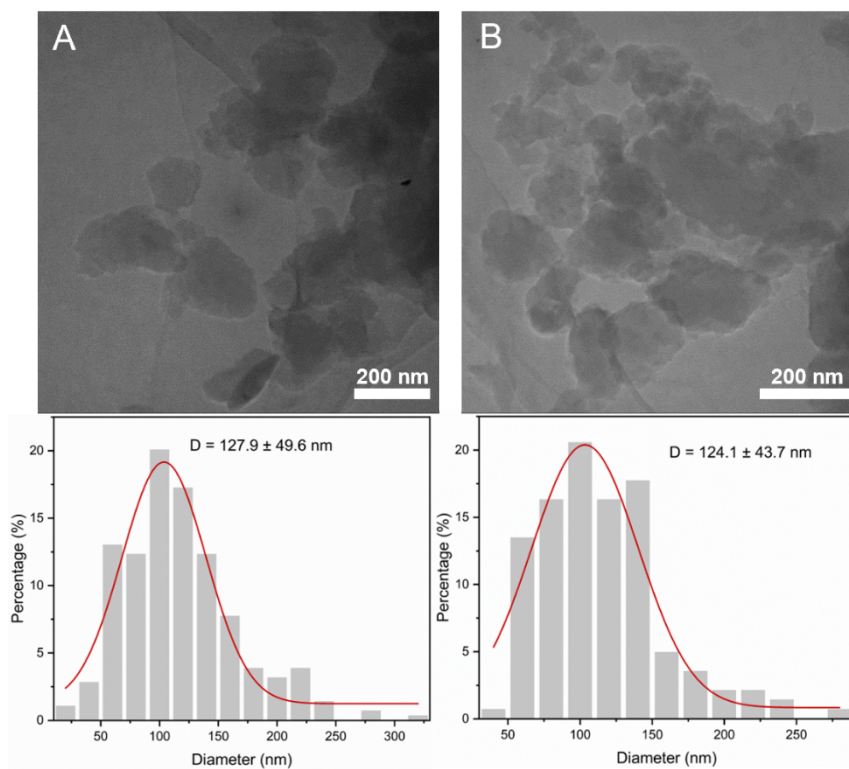

**Fig. S1** BQNPs images and size distributions of the second (A) and fourth (B) batches. The size distribution of BQNPs was determined by quantitative analysis of TEM images. Over 200 nanoparticles were measured.

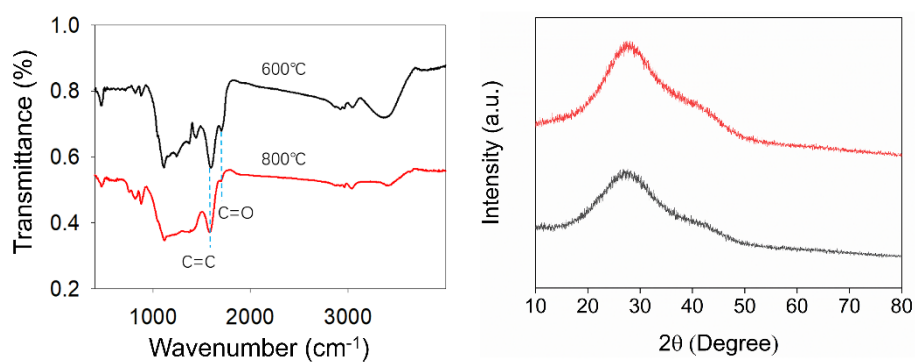

**Fig. S2** (A) FTIR spectra of BQNPs prepared at pyrolysis temperatures of 600 °C and 800 °C. (B) XRD of BQNPs before (black line) and after DNA probe adsorption (red line).

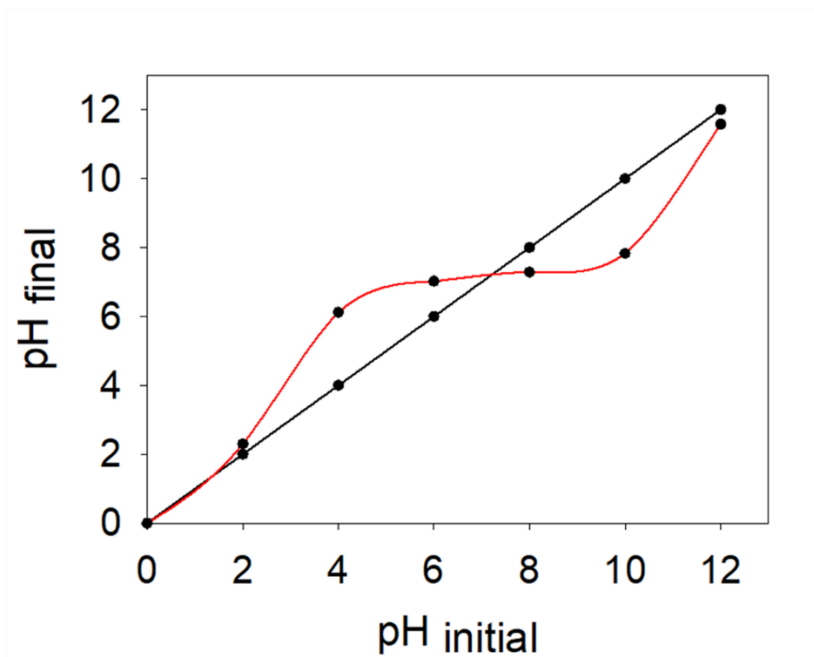

**Fig. S3** Plot for determination of isoelectric point of BQNPs prepared at 400 °C (black line,  $\text{pH}_{\text{initial}}$  vs  $\text{pH}_{\text{final}}$  (without BQNPs); red line,  $\text{pH}_{\text{initial}}$  vs  $\text{pH}_{\text{final}}$  (with BQNPs). 20 mg of the BQNPs were dispersed in 10 mL of the NaCl solutions with the various pHs (2, 4, 6, 8, 10 and 12). This was followed by incubation at room temperature for 48 h, and after that, the pH of each solution was measured using a pH meter. The point of intersection of the “ $\text{pH}_{\text{final}}$  vs  $\text{pH}_{\text{initial}}$ ” curves represent the isoelectric point of the adsorbent.

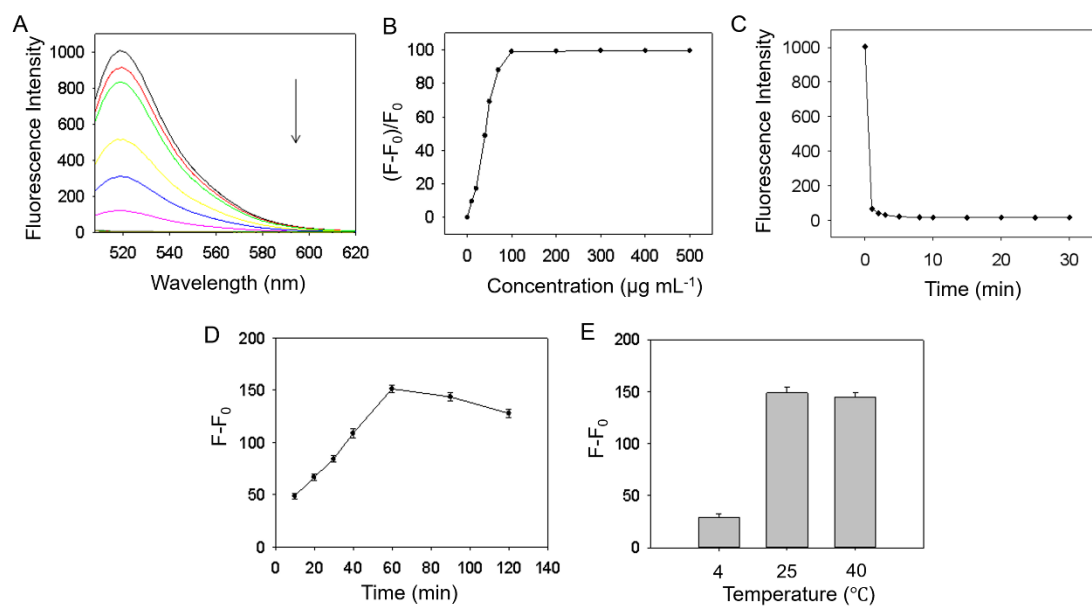

**Fig. S4** (A) Fluorescence spectrum of DNA probe (30 nM) incubated with various concentrations of BQNPs (0, 10, 20, 30, 50, 80, 100, 200, 300, 400 and 500 µg mL<sup>-1</sup>), and (B) Profiles of fluorescence quenching efficiency depending on the various concentrations of the BQNPs (0, 10, 20, 30, 50, 80, 100, 200, 300, 400 and 500 µg mL<sup>-1</sup>). (C) Time dependent change of fluorescence intensities by quenching of the DNA probe (30 nM) with BQNPs (100 µg mL<sup>-1</sup>). (D) The change of fluorescence intensities ( $F - F_0$ ) upon various incubation times and (E) at various temperatures during detection of tDNA (100 nM).  $F_0$  and  $F$  are fluorescence intensities in the absence and presence of the tDNA, respectively. The error bars represent standard deviations from triplicate measurements.

**Table S1.** Comparison of the different methods for DNA detection

| <b>Detection methods</b> | <b>Linear range<br/>(nM)</b> | <b>Detection limit<br/>(nM)</b> | <b>References</b> |
|--------------------------|------------------------------|---------------------------------|-------------------|
| Electrochemical          | 1 - 2000                     | 0.7                             | 1                 |
| Electrochemical          | -                            | 0.3                             | 2                 |
| Colorimetric             | -                            | 10                              | 3                 |
| Fluorescent              | 15 - 150                     | 3.18                            | 4                 |
| Fluorescent              | 10 - 200                     | 1.18                            | 5                 |
| Fluorescent              | 2 - 50                       | 1.04                            | This work         |

**Table S2.** Comparison of the different methods for E2 detection

| Detection methods | Linear range<br>(ng mL <sup>-1</sup> ) | Detection limit<br>(ng mL <sup>-1</sup> ) | References |
|-------------------|----------------------------------------|-------------------------------------------|------------|
| Electrochemical   | 0.26 - 2.64                            | 1.4                                       | 6          |
| Electrochemical   | 27.2 -54400                            | 28.6                                      | 7          |
| Colorimetric      | 20 - 10000                             | 20                                        | 8          |
| Fluorescent       | 1 - 50                                 | 0.34                                      | 9          |
| Fluorescent       | 0.13 - 54                              | 0.13                                      | 10         |
| Fluorescent       | 1 - 20                                 | 0.4                                       | This work  |

### SI References

- 1 M. El Aamri, H. Mohammadi and A. Amine, *Electroanalysis*, DOI:10.1002/elan.202100613.
- 2 T. S. Bronder, M. P. Jessing, A. Poghossian, M. Keusgen and M. J. Schöning, *Anal Chem*, 2018, **90**, 7747–7753.
- 3 Y. Liu, T. Li, C. Ling, Z. Wang, L. Jin, Y. Zhao, Z. Chen, S. Li, Y. Deng and N. He, *Chinese Chemical Letters*, 2019, **30**, 2359–2362.
- 4 B.-Y. Fang, C. Li, J. An, S.-D. Zhao, Z.-Y. Zhuang, Y.-D. Zhao and Y.-X. Zhang, *Nanoscale*, 2018, **10**, 5532–5538.
- 5 S. Zhang, K. Wang, K.-B. Li, W. Shi, W.-P. Jia, X. Chen, T. Sun and D.-M. Han, *Biosensors and Bioelectronics*, 2017, **91**, 374–379.
- 6 F. C. Moraes, B. Rossi, M. C. Donatoni, K. T. de Oliveira and E. C. Pereira, *Anal Chim Acta*, 2015, **881**, 37–43.
- 7 K. Spsychalska, D. Zając and J. Cabaj, *RSC Adv.*, 2020, **10**, 9079–9087.
- 8 L. Qiao, H. Wang, J. He, S. Yang and A. Chen, *Food Chemistry*, 2021, **340**, 128181.
- 9 S. Bhogal, I. Mohiuddin, S. Kumar, A. K. Malik, K.-H. Kim and K. Kaur, *Science of The Total Environment*, 2022, **847**, 157356.
- 10 X. Ni, B. Xia, L. Wang, J. Ye, G. Du, H. Feng, X. Zhou, T. Zhang and W. Wang, *Analytical Biochemistry*, 2017, **523**, 17–23.
